# Supplementary material for: TorsinB overexpression prevents abnormal twisting in DYT1 dystonia mouse models
Source: eLife. 2020 Mar 23;9:e54285. doi: 10.7554/eLife.54285 (PMC7141835; doi:10.7554/eLife.54285)
Supplement: Figure 1—figure supplement 1—source data 1. [file elife-54285-fig1-figsupp1-data1.xlsx]

## Sheet: A
	WT				TorsinB null
P15	7.3	6.9	7.5	8	7.9	6.7	7.8	7.4	7.7
P28	16.5	15	13.5	15.7	15.8	15	13.4	14	14.1
P56	24.6	23.8	22.1	22	24.5	24.1	22.5	22.3	22.4

## Sheet: D
WT	TorsinB null
1286.55	1325.69
1339.44	1324.75
1228.93	1241.89
1264.78	1240.22
