# Supplementary material for: TorsinB overexpression prevents abnormal twisting in DYT1 dystonia mouse models
Source: eLife. 2020 Mar 23;9:e54285. doi: 10.7554/eLife.54285 (PMC7141835; doi:10.7554/eLife.54285)
Supplement: Figure 1—figure supplement 2—source data 1. [file elife-54285-fig1-figsupp2-data1.xlsx]

## Sheet: B
Control	Emx1-dCKO
427	312
265	276
310	303
254	311
311	315
292	294
255	295
315	270
224	306
284
280
273
276

## Sheet: C
Control	Emx1-dCKO
552.889	592.889
571.556	509.911
585.778	607.101
525.888	620.414
561.834	561.834
579.142	500.592
551.183	495.266
597.781	532.544
517.899	476.627
505.917
457.988
493.935
501.923
