# Supplementary material for: TorsinB overexpression prevents abnormal twisting in DYT1 dystonia mouse models
Source: eLife. 2020 Mar 23;9:e54285. doi: 10.7554/eLife.54285 (PMC7141835; doi:10.7554/eLife.54285)
Supplement: Figure 1—figure supplement 4—source data 1. [file elife-54285-fig1-figsupp4-data1.xlsx]

## Sheet: A
Layer I-III	Control	Emx1(A)-CKO		Layer IV-VI	Control	Emx1(A)-CKO
	1.45458	1.04238			0.384935	0.863456
	1.53285	0.859468			0.696758	0.825517
	0.456579	1.38755			0.666508	0.9122
	1.52497	1.10892			0.926005	1.15892
	0.778779	0.798826			1.0942	0.412464
	0.545771	0.877529			0.658548	0.881887
	1.62577	0.728254			0.605487	1.26803
	1.60721	1.03587			1.30166	1.15432
	1.96244	0.775983			1.38448	1.03815
	1.16578	1.39959			0.982629	0.849441
	1.15529	1.14151			0.77646	1.0273
	0.83439	1.49195			0.757234	0.837441
	1.24752	1.11911			0.813598	0.699801
	1.01725	1.34665			1.10426	1.05154
	0.841158	1.13015			1.27986	1.05406
	1.10303	0.603434			1.10028	0.911572
	0.805653	0.443978			0.839701	1.63081
	1.09266	0.692814			0.760829	1.30541
	1.37464	0.997568			1.05503	1.917
	1.16435	0.867038			0.894316	1.34532
	0.898012	0.826631			0.598271	0.405905
	1.0736	0.504373			1.01157	1.37006
	1.18496	0.425048			1.13491	1.01088
	1.07963	0.637883			0.969196	0.70088
	1.13251	0.612372			1.0514	1.02274
	0.866978	0.968276			1.3018	1.52374
	1.33696	0.566069			1.63311	1.05766
	1.20383	0.286324			1.07562	1.50398
	1.33113	0.828061			0.912417	1.13147
	0.156165	0.878832			1.96894	0.977035
	1.4228	0.442302			1.64849	0.815154
	0.553096	0.840474			1.20703	1.45946
	0.545586	0.688841			1.06965	1.14056
	1.04083	0.895093			1.23684	1.26134
	0.682634	0.933639			1.63598	0.96542
	0.473523	1.25547			1.19411	1.3294
	0.638812	1.08646			0.903723	0.920146
	0.795599	1.68169			0.983444	0.993768
	0.838488	2.41324			1.03877	1.60549
	0.602937	1.64793			0.866458	1.43869
	0.960764	1.31474			0.916248	0.985365
	0.753329	1.15628			1.26541	1.09668
	0.896895	1.47432			1.30368	0.463111
	0.854316	1.04561			0.950001	0.581996
	0.635647	0.942205			0.585878	1.00186
	1.21748	1.52634			0.822975	0.638062
	0.84091	1.11234			0.808441	0.313596
	0.728193	1.20308			0.72067	0.627764
	0.998254	0.702558			1.21902	1.08248
	0.975723	0.976902			1.11929	0.796648
	1.54806	0.535407			1.00481	1.60284
	1.31139	0.644336			0.743314	1.09295
	0.920792	0.934882			2.23666	0.871713
	1.27018	0.669412			0.693052	0.554762
	1.23678	1.00291			0.936903	0.970849
	0.922653	1.07143			1.2248	0.945225
	1.08316	1.86144			0.893975	0.848111
	0.922096	0.984659			0.69122	1.15743
	0.863813	0.954431			1.34676	1.48864
	1.05604	1.00694			1.117	0.842879
	0.82055	1.17118			0.788239	0.897172
	0.905956	0.838985			1.15946	1.18114
	0.919985	0.414931			0.569751	0.952031
	0.951454	0.505986			1.42256	0.52954
	0.615227	1.43596			0.859625	0.362976
	1.23685	1.00018			1.06871	1.33311
	1.87107	1.55153			0.818763	0.933414
	1.25162	1.62471			0.874854	0.761509
	1.3981	1.05709			1.00547	0.762127
	0.845253	0.424428			0.87702	1.1985
	0.467378	1.22512			0.744781	0.933672
	0.824275	1.30065			0.439551	1.05655
	0.81577	0.896274			0.732218	1.19431
	0.719563	1.28812			0.86599	1.40579
	0.717268	0.830357			0.775043	0.892128
	0.716461	1.22028			0.656907	1.14152
	0.330704	1.55371			1.16082	0.826001
	0.659916	1.20612			0.886631	0.972956
	1.42932	1.269			0.923312	0.916734
	0.753454	1.01346			0.915033	1.19632
	1.22226	0.795412			1.01424	0.680722
	0.722172	1.12922			1.06397	0.858123
	0.894473	1.22629			0.828468	1.12431
	1.07311	0.702246			0.952875	0.808165
	1.13859	1.02848			0.778095	1.00268
	0.800439	0.968336			1.05356	0.657051
	1.16243	0.820799			1.51792	1.31447
	0.629315	0.846991			0.9019	0.49205
	0.610447	0.90726			0.730375	0.942484
	0.720744	0.447392			1.04858	1.49192
	0.726827	0.816144			0.731894	0.871042
	0.611254	0.883674			0.745541	0.462779
	1.47674	1.61907			0.890893	0.421857
	1.37383	0.594309			1.75196	0.908415
	1.11227	1.8607			1.5337	0.96518
	0.992791	1.12189			1.36887	1.32261
	1.58325	1.32573			1.49966	1.48615
	1.59635	0.863377			0.902287	1.72996
	1.36086	1.49598			0.287909	0.618116
	0.796468	0.441433			0.727958	1.01439

## Sheet: B
Control	Emx1(A)-CKO
37	34
42	34
43	38
37	40
36	27
37	36
37	29
36	36
43	37
