# Supplementary material for: TorsinB overexpression prevents abnormal twisting in DYT1 dystonia mouse models
Source: eLife. 2020 Mar 23;9:e54285. doi: 10.7554/eLife.54285 (PMC7141835; doi:10.7554/eLife.54285)
Supplement: Figure 1—figure supplement 5—source data 1. [file elife-54285-fig1-figsupp5-data1.xlsx]

## Sheet: A
Age (days)	Emx1-Cre control										Emx1(AB)-CKO
0	1.5	1.6	1.58	1.5	1.38	0.94	1.34	1.34	1.42		1.2	1.4	1.2	1.5	1.4	1.6	1.35	1.41	1.37	1.4	1.27	1.24
1	1.9	1.9	1.96	1.76	1.59	1.08	1.54	1.49	1.56		1.5	1.6	1.5	1.8	1.6	1.8	1.48	1.64	1.54	1.64	1.4	1.36
2	2.3	2.4	2.46	2.25	1.9	1.34	1.78	1.87	1.82		1.8	1.9	1.8	2.1	2	2.2	1.67	1.97	1.85	1.97	1.63	1.69
3	2.6	3	3.01	2.6	2.34	1.65	2.29	2.25	2.27		2.1	2.3	2.2	2.6	2.4	2.7	1.93	2.26	2.27	2.37	2.01	1.91
4	3	3.7	3.75	3.22	2.6	1.84	2.71	2.27	2.44		2.5	2.7	2.7	2.9	2.8	3.1	2.03	2.81	2.66	2.56	2.42	2.13
5	3.7	4.6	4.16	3.64	3.19	2.18	3.33	3.04	2.82		2.7	2.7	2.7	3.3	3.1	3.6	2.43	3.04	3	2.95	2.66	2.49
6	4.1	5.5	4.55	4.02	3.61	2.61	3.74	3.44	3.4		3.2	3.3	3.4	3.8	3.9	4.1	2.6	3.32	3.25	3.27	2.99	2.75
7	4.6	6.4	5.34	4.65	4.06	3.01	4.25	3.8	3.63		3.6	4	3.7	4.3	4.2	4.6	2.82	3.91	3.68	3.75	3.5	2.97
8	5	7.4	6.14	5.45	4.6	3.51	4.72	4.28	4.12		4.1	4.4	4	4.5	4.7	5	3.2	4.37	4.19	4.37	3.83	3.32
9	5.3	7.9	6.47	6.18	4.94	3.84	5.2	4.74	4.43		4.6	4.9	4.7	4.9	5.2	5.4	3.37	4.61	4.6	4.87	4.24	3.41
10	5.9	8.6	6.98	6.68	5.36	4.18	5.53	5.25	4.85		5.2	5.7	5.3	5.7	5.8	5.6	3.71	5.05	5.05	5.3	4.5	3.65
11	6.2	9.2	7.38	7.78	6.02	4.66	6.04	5.86	5.4		5.7	6.2	5.7	6.5	6.5	5.9	3.96	5.5	5.71	5.78	5.02	4.04
12	6.6	9.8	7.73	8.37	6.36	5.09	6.41	6.18	5.71		6	6.5	6.3	6.8	7	6.3	4.05	5.91	6.12	6.13	5.34	4.13
13	10.6	11.5	8.23	8.45	6.69	5.46	7.01	6.71	6.13		6.8	7.1	6.8	7	7.9	6.8	4.25	6.21	6.22	6.41	5.6	4.43
14	10.8	11.7	8.31	8.64	6.92	5.25	7.28	7	6.45		8.1	7.6	7.9	7.4	7.2	6.9	4.5	6.26	6.26	6.72	5.93	4.59
15	11.1	11.9	8.46	8.67	7.05	6.03	7.74	7.29	6.63		8.1	7.7	7.9	7.6	7.3	6.9	4.52	6.44	6.4	6.86	6	4.53
16	11.3	12.4	8.67	8.82	7.23	6.34	7.83	7.47	6.82		8.1	7.5	7.7	7.7	7.4	6.7	4.46	6.15	6.38	6.79	6	4.72
17	11.6	12.6	8.71	9.29	7.42	6.46	8	7.51	7.05		8	7.6	7.3	7.4	7.1	6.7	4.43	5.96	6.26	6.83	5.85	4.9
18	12	12.6	9.25	9.97	7.71	6.49	8.14	7.7	7.18		7.8	7.4	7.2	7.4	7.1	6.5	4.39	6.01	6.2	6.77	5.75	4.88
19	12.6	12.4	9.95	10.46	8.1	6.66	8.42	7.87	7.48		7.9	7.3	7.1	7.3	6.9	6.2	4.32	5.9	6.19	6.7	5.55	4.83
20	13.3	12.3	11.07	11.16	8.7	6.99	8.48	8.35	7.78		7.8	7.6	7.2	7	7	5.8	4.34	5.58	6.22	6.67	5.51	4.84
21	14.1	12.6	11.92	11.9	9.46	7.61	8.91	9.02	8.6		7.7	7.6	7.2	7.1	7.2	5.5	4.13	5.35	6.18	6.69	5.32	4.81
22	15.2	12.6	12.82	12.85	10.46	8	9.54	9.74	9.26		7.7	7.4	7.5	7.3	7.2	5.3	3.88	5	6.21	6.59	5.05	4.63
23	15.8	13	14.18	13.86	11.48	8.6	10.3	10.49	10.38		7.5	7.4	7.5	7.1	7.1	5.4	3.88	4.71	6.44	6.58	5.4	4.4
24	16.3	12.3	15.09	15.25	12	8.97	10.37	10.91	10.97		7.1	7.1	7.1	6.8	6.7	5.9	3.9	5.31	6.5	6.5	5.41	4.13
25	17	13.4	15.72	16.38	13.3	10.24	11	11.38	12.61		8.3	8.4	8.4	8.5	8.1	6	4.03	5.45	6.54	6.42	5.52	3.9
26	17.4	14.2	16.98	17.44	14.12	10.62	11.63	11.93	13.58		8.8	8.8	8.5	8.5	8.2	6.2	4.24	6.87	7.62	6.53	6.9	3.86
27	18.6	14.7	17.45	18	15.31	11.55	12.22	12.52	14.75		7.9	9.1	9.1	9.2	7.4	6.9	3.85	6.43	7.63	6.91	6.78	4.07
28	19.5	14.8	17.86	18.6	16.16	12.22	12.63	13.27	16.04		7.4	10.2	9.7	9.5	7.1	6.4	4.11	7.97	9	8.38	8.45	4.2

## Sheet: B
Age	Control	Emx1(AB)-CKO
28	0
28	0	0
28	0	0
28	0	0
28	0	0
28	0	0
28	0	0
28	0	0
28	0	0
28	0	0
28	0	0
28	0	0
28	0	0
28	0	0
28	0	0
28	0	0
28	0	0
28	0	0
28	0	0
28	0	0
25		1
28	0	0
28	0	0
28	0	0
28	0	0
28	0	0
28	0	0
28	0	0
28	0	0
28	0	0
28	0	0
28	0	0
28	0	0
28	0	0
28	0	0
28	0	0
26		1
26		1
28	0	1
28	0	0
28	0	0
28	0	0
28	0
28	0
