# Supplementary material for: TorsinB overexpression prevents abnormal twisting in DYT1 dystonia mouse models
Source: eLife. 2020 Mar 23;9:e54285. doi: 10.7554/eLife.54285 (PMC7141835; doi:10.7554/eLife.54285)
Supplement: Figure 1—source data 1. [file elife-54285-fig1-data1.xlsx]

## Sheet: 1C
Control	1207.12	1208.46	1201.78	1239.11	1239.11	1249.78	1320.89	1271.11	1288.89
Emx1-CKO	1192.43	1082.94	1028.19	1073.59	1096.89	1164.44	1146.67	1111.11	1164.44
Control	1320.54	1288.39	1358.9	1265.88
Emx1-dCKO	530.357	479.464	420.536	441.964	492.857	488.724	480.712	363.205	443.323

## Sheet: 1E
CUX1
Control	409	394	471	299	418	395	462	425	461
Emx1-CKO	373	402	411	363	402	459	361	430	376
Control	375	371	467	475
Emx1-dCKO	60	112	75	126	88	98
CTIP2
Control	299	315	227	212	301	247	347	332	332
Emx1-CKO	330	317	244	276	200	298	313	321	308
Control	202	203	318	356
Emx1-dCKO	1	3	0	6	9

## Sheet: 1F
	Emx1-CKO	Emx1-dCKO
Clasping	6	14
No clasping	6	0
