# Supplementary material for: TorsinB overexpression prevents abnormal twisting in DYT1 dystonia mouse models
Source: eLife. 2020 Mar 23;9:e54285. doi: 10.7554/eLife.54285 (PMC7141835; doi:10.7554/eLife.54285)
Supplement: Figure 2—figure supplement 1—source data 1. [file elife-54285-fig2-figsupp1-data1.xlsx]

## Sheet: B
Control	Emx-SKI-B0
501.926	506.222
507.407	503.852
512.148

## Sheet: C
	Control				Emx1-SKI-B1
CUX1	411	412	432		393	364	397
CTIP2	270	269	324		289	360	294
