# Supplementary material for: TorsinB overexpression prevents abnormal twisting in DYT1 dystonia mouse models
Source: eLife. 2020 Mar 23;9:e54285. doi: 10.7554/eLife.54285 (PMC7141835; doi:10.7554/eLife.54285)
Supplement: Figure 2—source data 1. [file elife-54285-fig2-data1.xlsx]

## Sheet: 2B
Control	1280	1041.78	1230.22
Emx1-SKI	1160.89	1198.22	1184	1121.78	1139.56
Control	1260	1224.44	1200.44
Emx1-SKI-B1	910.222	931.111	913.333
Control	1055.36	1141.07
Emx1-SKI-B0	516.964	463.393	519.643

## Sheet: 2C
Control	396	400	467
Emx1-SKI	442	360	499	416	506
Control	385	397
Emx1-SKI-B0	273	119	265

## Sheet: 2D
Control	227	196	260
Emx1-SKI	215	327	234	230	264
Control	239	217
Emx1-SKI-B0	3	13	7

## Sheet: 2E
	Emx1-SKI	Emx1-SKI-B1
Clasping	6	11
No clasping	6	0
