# Supplementary material for: TorsinB overexpression prevents abnormal twisting in DYT1 dystonia mouse models
Source: eLife. 2020 Mar 23;9:e54285. doi: 10.7554/eLife.54285 (PMC7141835; doi:10.7554/eLife.54285)
Supplement: Figure 3—figure supplement 1—source data 1. [file elife-54285-fig3-figsupp1-data1.xlsx]

## Sheet: B
Nes-Cre	Nes-Cre;B-OE
1.35813	1.07775
0.875931	0.845223
0.765935	0.802049
