# Supplementary material for: TorsinB overexpression prevents abnormal twisting in DYT1 dystonia mouse models
Source: eLife. 2020 Mar 23;9:e54285. doi: 10.7554/eLife.54285 (PMC7141835; doi:10.7554/eLife.54285)
Supplement: Figure 3—figure supplement 2—source data 1. [file elife-54285-fig3-figsupp2-data1.xlsx]

## Sheet: B
Nes-Cre	Nes-Cre;B-OE
1.1403	1.13657
1.05516	0.793003
0.804545	1.41454
