# Supplementary material for: TorsinB overexpression prevents abnormal twisting in DYT1 dystonia mouse models
Source: eLife. 2020 Mar 23;9:e54285. doi: 10.7554/eLife.54285 (PMC7141835; doi:10.7554/eLife.54285)
Supplement: Figure 3—figure supplement 3—source data 1. [file elife-54285-fig3-figsupp3-data1.xlsx]

## Sheet: B
	B-WT			B-OE
Cre control	34.42	36.64	31.72	34.76	32.87	30.92
N-CKO	25.74	27.22	26.79	34.77	30.515	30.867
