# Supplementary material for: TorsinB overexpression prevents abnormal twisting in DYT1 dystonia mouse models
Source: eLife. 2020 Mar 23;9:e54285. doi: 10.7554/eLife.54285 (PMC7141835; doi:10.7554/eLife.54285)
Supplement: Figure 3—source data 1. [file elife-54285-fig3-data1.xlsx]

## Sheet: 3C
Nes-Cre	Nes-Cre;B-OE
0.953655	52.398
1.02547	23.9975
1.02087	18.8461

## Sheet: 3E
Age (days)	Control												Control B-OE												Nes(A)-CKO												Nes(A)-CKO B-OE
4	3.4	3	3.5	3.4	3.7	3.6	3.5						3.3	3.5	3.7	3.4	3.6	3.4							1.7	2	1.9	1.9	1.8	2.1	2	2					3.4	3.4	3.4	3.6	3.5	3.7	3.6
8	4.7	3.9	4.4	4.3	4.3	4.4	4.7						5.1	4.7	3.4	4.4	4.2	4.1							1.7	2.1	1.9	1.9	1.8	2	1.9	2.1					5.2	4.7	4.3	3.8	4.3	4.5	4.3
12	6.7	5.3	6.6	7.8	7.3	7.1	6.5						5.8	4.3	4.3	5.7	5	5								1.9	2										6.1	6.3	5.1	5.3	5.2	6.8	5.3
16	7.7	6.3	7.6	9.1	8.2	8.1	10.8						6.2	4.7	4.7	5.7	5	6.1																			6.4	5	5.2	6	5.6	6.8	7.7
23	9	9	9.6	12.1	10.5	11.8	12.8						6.8	4.6	6.1	5.5	5.7	6.2																			8.1	6.4	5.2	5.1	5.3	9.9	7
30	14.8	13.2	12.8	15.3	15.4	15.7	17.8						9.5	7.5	8.2	7.1	6.3	9.7																			11.9	9.9	7.4	7.4	7.8	14.9	10.6
40	17.6	16.2	18.3	21.1	18.3	18.4	21.7						13.7	13.5	12.9	13.9	13.7	15.4																			15.1	14.2	11.2	13.2	13.1	19.5	18
56	20.3	20.5	21.7	24.3	22.1	17.7	23.1						20.9	17.7	17.8	16.5	19.7	17.8																			19.9	21	15.5	14.7	18.1	23.7	19.2
84	22.8	22.3	22.7	24.8	21.3	18.9	24.1						22.7	18.9	19.9	18.5	20.8	19.1																			20.1	22.1	19.8	19.5	22.1	23.5	20.1
112	23.5	24	24	24.8	24.6	23.7	24.5						23	19.6	19.5	21.5	21.1	19.5																			21.8	22.1	19.8	17.1	21.2	24.2	20.7

## Sheet: 3F
PND	Control	Control B-OE	N-CKO	N-CKO B-OE
6			1
8			1
10			1
10			1
10			1
10			1
11			1
12			1
12			1
15			1
31		1
112	0	0		0
112	0	0		0
112	0	0		0
112	0	0		0
112	0	0		0
112	0	0		0
112	0			0
