# Supplementary material for: TorsinB overexpression prevents abnormal twisting in DYT1 dystonia mouse models
Source: eLife. 2020 Mar 23;9:e54285. doi: 10.7554/eLife.54285 (PMC7141835; doi:10.7554/eLife.54285)
Supplement: Figure 4—source data 1. [file elife-54285-fig4-data1.xlsx]

## Sheet: A
Age(days)	Cre control										Cre control B-OE										Nes-SKI										Nes-SKI B-OE
8	4.7	5.2	5.2	5	4.5	5.5	5.6				4.5	4.4	4.2	5.2	4.5	5	4.4	4.2			2.2	2.3	2.4	2.3	2.3	2.3	2.4				4.7	4.4	4.2	4	4.1	4.2	4.4	5.1
15	8.3	9	8.3	9.3	9.2	8.8	11.4				6.8	6.4	6.3	6.8	6.6	7.3	6.1	7.1			4.1	4.1	3.8	3.9	3.5	3.9	4.2				7.6	6.5	5.5	5.9	6.8	6.9	6.7	7.1
21	9	10.2	9.1	9.6	9.3	12.1	12.5				6.8	6.4	6.4	6.9	6.5	8.4	6.7	8			4	4.5	4.5	4.6	4.2	4.3	4.5				7	6.5	6	6.4	6.1	6.6	6.8	9.2
28	12.3	13.5	14.8	12.9	11.6	14.5	18.3				7.4	7.3	8.8	8.1	7.2	7.9	5.9	7.6			5.8	5.6	5.5	5.7	4.8	5.6	5.9				7	7	5.2	6.4	7.9	7.3	7.2	9.6
56	17.5	17.3	23	18.6	16.1	23.2	21.9				19.8	16.5	20.5	16.6	17	15.7	16.5	16.7			14.5	15	13.6	12.1	13.5	12.7	14.7				18.8	17.7	15.6	18.9	19.2	17.1	17.5	16.3
