# Supplementary material for: TorsinB overexpression prevents abnormal twisting in DYT1 dystonia mouse models
Source: eLife. 2020 Mar 23;9:e54285. doi: 10.7554/eLife.54285 (PMC7141835; doi:10.7554/eLife.54285)
Supplement: Figure 5—figure supplement 1—source data 1. [file elife-54285-fig5-figsupp1-data1.xlsx]

## Sheet: B
Age (days)	Cre Ctrl								Cre Ctrl B-OE
8	3.6	3.9	3.8	3.8	4	3.6			3.1	3.2	3.4	3.6	3.5	3.8
16	9	8.7	8.7	8.6	9.4	9.2			8.5	8.5	9.1	7.1	9	9.3
32	8.1	19.8	13.5	19.7	17.2	15			19	16.3	18.7	15.2	14.5	15
56	26.5	25.9	20.2	25.2	24.4	25.8			23.8	18.6	27.3	23.1	17.4	24.8

## Sheet: C
Righting	Age (days)	Cre Ctrl								Cre Ctrl B-OE
	8	1.33333	3.66667	2	1.66667	1	1.66667			1.33333	1.33333	1.33333	1	2	1.33333
	10	1.33333	3	1.66667	1.33333	3	1			1	2.33333	1	1	1	1
	12	1	1.66667	1	1	1.33333	1			1	1	1	1	3.33333	1
NG	Age (days)	Cre Ctrl								Cre Ctrl B-OE
	8	2	2	3	2	1	2			2	1	2	2	2	2
	10	1	1	1	1	1	2			2	2	1	2	1	2
	12	0	0	0	0	0	0			0	0	0	0	0	0
FH	Cre Ctrl	Cre Ctrl B-OE
	10	10
	11	8
	18	10
	10	15
	22	20
	8	12
