# Supplementary material for: TorsinB overexpression prevents abnormal twisting in DYT1 dystonia mouse models
Source: eLife. 2020 Mar 23;9:e54285. doi: 10.7554/eLife.54285 (PMC7141835; doi:10.7554/eLife.54285)
Supplement: Figure 5—figure supplement 2—source data 1. [file elife-54285-fig5-figsupp2-data1.xlsx]

## Sheet: A
	B-WT				B-OE
Cre Ctrl	1251.33	1297.48	1232.62	1245.87	1235.41	1250.98	1227.01	1278.23
Dlx-CKO	1275.45	1260.38	1240.87	1225.19	1228.9	1236.78	1260.52	1238.62

## Sheet: B
	B-WT				B-OE
Cre Ctrl	11.78	12.38	13	10.88	9.56	13.38	11.07	10.69
Dlx-CKO	9.969	12.05	10.14	11.636	12.55	10.12	9.16	9.62

## Sheet: C
	B-WT								B-OE
Cre Ctrl	2.05742	1.82875	2.02195	1.74571					1.92681	2.17123	1.86879	1.94963
Dlx-CKO	1.9474	1.81509	1.89874	1.86968					2.0089	1.90117	1.7916	2.14695
