# Supplementary material for: TorsinB overexpression prevents abnormal twisting in DYT1 dystonia mouse models
Source: eLife. 2020 Mar 23;9:e54285. doi: 10.7554/eLife.54285 (PMC7141835; doi:10.7554/eLife.54285)
Supplement: Figure 5—source data 1. [file elife-54285-fig5-data1.xlsx]

## Sheet: 4A
Cre control	0	0	0	0	0.75	0	0	2.35	0	0
Dlx-CKO	43.305	56.55	17.675	19.93	13.8	54.67	25.29	55.755	19.875	50.515	48.97
Cre control;B-OE	0	0	0	8.38	3.83	0	0	4.455	0	3.175	15.265	0
Dlx-CKO; B-OE	8.135	11.865	0	0	0	0.3	0	0.45	0	0	2.25	0	0	11.555	2.265

## Sheet: 4B
	Dlx-CKO	Dlx-CKO; B-OE
Trunk twisting	9	0
No trunk twisting	2	15

## Sheet: 4C
Cre control	18235.8	16840.8	17511	15546.4	16133.3	17964.8
Dlx-CKO	9856.72	12627.9	10707.4	11181.2	12017.9	12016	10936
Cre control;B-OE	17336.4	18290.4	17006.9	16844.6	18439.7	16304.9
Dlx-CKO; B-OE	19309.9	15620.5	16793.3	16934	17503.1	15770.1	18831
